# Supplementary material
Source: HighWire-hosted journal article supplement (https://jnm.snmjournals.org/highwire/filestream/95431/field_highwire_adjunct_files/0/219691_Supplemental_Data.pdf)
Supplement: 219691_Supplemental_Data.pdf [file 219691_Supplemental_Data.pdf]

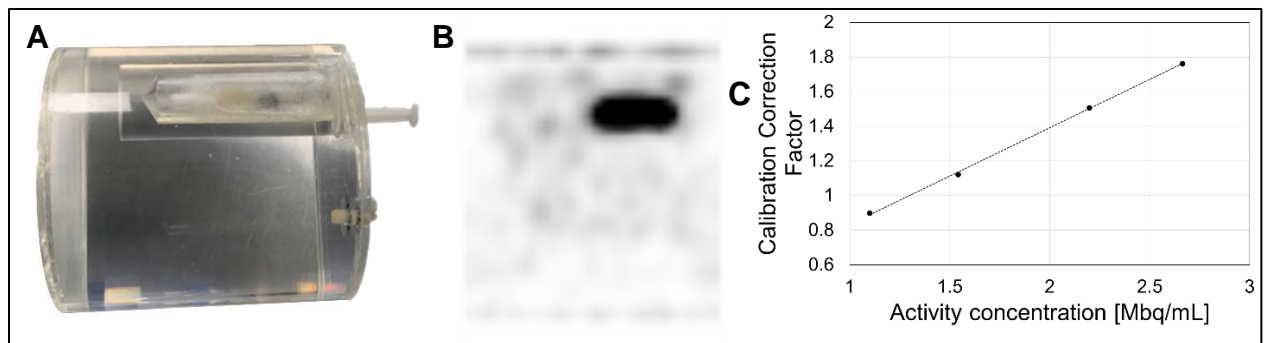

**Supplemental Figure 1** Yttrium-90 ( $^{90}\text{Y}$ ) phantom study. A) A cylinder-shaped phantom was filled with saline to mimic the body's water compartment. B) Four 5 mL syringes containing  $^{90}\text{Y}$  microspheres of various activity concentrations were scanned sequentially under the same conditions and with the same acquisition protocol as clinical patients. C) Calibration Correction Factors were calculated for each activity concentration in four phantoms.
